# Supplementary material
Source: HighWire-hosted journal article supplement (https://bmjopen.bmj.com/content/7/12/e019462)
Supplement: inline-supplementary-material-1 [file inline-supplementary-material-1.pdf]

## WALKING IN CONSUMERS SHOES: SEM 2 DATA COLLECTION FORM

| SCENARIO TEN                                | VERSION EIGHT                                                                                                                                                                                                                                                                                               |
|---------------------------------------------|-------------------------------------------------------------------------------------------------------------------------------------------------------------------------------------------------------------------------------------------------------------------------------------------------------------|
| Product requested                           | VENTOLIN® [Salbutamol]                                                                                                                                                                                                                                                                                      |
| Who is the patient?                         | Self                                                                                                                                                                                                                                                                                                        |
| How long:                                   | Had asthma since you were a child                                                                                                                                                                                                                                                                           |
| Actual Symptoms – what are they?            | Wheezy during the day                                                                                                                                                                                                                                                                                       |
| Treatment for this or any other conditions? | Take puffer (Ventolin®) three or four times a day when you feel wheezy. Helps for a little while.<br><br>If asked you are not coughing at night.                                                                                                                                                            |
| Additional Info                             | Think you only have mild asthma that is under control. Do not realise that you are overusing your puffer. Do have a Seretide® [fluticasone propionate/salmeterol] inhaler somewhere, not using it at the moment.<br><br>No asthma management plan. Haven't discussed asthma with a doctor for a year or so. |
| Have you used it before?                    | Yes.                                                                                                                                                                                                                                                                                                        |
| SCENARIO ANGLE                              | Refer to medical practitioner - poorly controlled asthma, no preventer use, and no asthma management plan.                                                                                                                                                                                                  |

|                      |  |
|----------------------|--|
| PHARMACY NAME AND ID |  |
| STUDENT NAME AND ID  |  |
| VISIT DATE           |  |
| VISIT TIME           |  |

| WHO SERVED YOU?                                         |   |   |
|---------------------------------------------------------|---|---|
| Pharmacy assistant?                                     | Y | N |
| Pharmacist?                                             | Y | N |
| Did the assistant ask the pharmacist for advice?        | Y | N |
| Did the assistant refer the customer to the pharmacist? | Y | N |
| Notes:                                                  |   |   |
|                                                         |   |   |

## STUDENT FEEDBACK FORM (SCENARIO TEN)

| <b>WHAT: DID THEY FIND OUT?</b>                                                |      |          |              |     |
|--------------------------------------------------------------------------------|------|----------|--------------|-----|
| W: Who the medicine was for?                                                   |      |          |              |     |
| Self                                                                           | Y    | N        | Part         | N/A |
| H: How long you'd had the symptoms?                                            |      |          |              |     |
| Years – diagnosed with asthma as a child                                       | Y    | N        | Part         | N/A |
| A: About the actual symptoms?                                                  |      |          |              |     |
| Wheezy during day                                                              | Y    | N        | Part         | N/A |
| T: About treatment for this or any other condition?                            |      |          |              |     |
| What treatment you'd already tried? (Regular salbutamol use)                   | Y    | N        | Part         | N/A |
| Was the treatment successful? (Moderately)                                     | Y    | N        | Part         | N/A |
| If you take any other medication? (Have Seretide® – don't use it)              | Y    | N        | Part         | N/A |
| If you have any other medical conditions? (None)                               | Y    | N        | Part         | N/A |
| <b>STOP: DID THEY STOP AND?</b>                                                |      |          |              |     |
| Consider the issue? (Poorly controlled asthma/no asthma management plan)       | Y    | N        | Part         | N/A |
| <b>GO: DID THEY?</b>                                                           |      |          |              |     |
| Address the issue?                                                             |      |          |              |     |
| Refer to GP for review                                                         | Y    | N        | Part         | N/A |
| Suggest a review of asthma management plan                                     | Y    | N        | Part         | N/A |
| Other? (please record here)                                                    |      |          |              |     |
| Recommend/provide any <b>products</b> ?                                        | Y    | N        | Part         | N/A |
| Record Product Name/s and Strength:                                            |      |          |              |     |
| For each product they recommended/provided, did they:                          |      |          |              |     |
| Recommend an appropriate dose and dosage interval?                             | Y    | N        | Part         | N/A |
| Recommend how long to use the product for?                                     | Y    | N        | Part         | N/A |
| Provide relevant <b>verbal advice</b> on asthma management?                    | Y    | N        | Part         | N/A |
| Record type of Verbal Advice                                                   |      |          |              |     |
| Provide relevant <b>written advice</b> ? (please attach to this form)          | Y    | N        | Part         | N/A |
| Provide appropriate <b>follow-on advice</b> ?                                  |      |          |              |     |
| Refer you to the doctor for the presenting symptoms?                           | Y    | N        | Part         | N/A |
| Tell the customer when to return to the pharmacy?                              | Y    | N        | Part         | N/A |
| Tell the customer when to visit the doctor (e.g. if it persists)?              | Y    | N        | Part         | N/A |
| Record any specific Follow-on advice (i.e. advice on WHAT to do next and WHEN) |      |          |              |     |
| <b>OVERALL</b>                                                                 |      |          |              |     |
| Do you think the visit had an <b>appropriate outcome</b> ?                     | Y    | N        | Part         | N/A |
| Do you think they established a <b>good rapport</b> with you?                  | Y    | N        | Part         | N/A |
| How would you rate the information they provided?                              | Good | Adequate | Not Adequate |     |
| Do you have any comments?                                                      |      |          |              |     |

## COUNSELLOR FEEDBACK FORM (SCENARIO TEN)

| WHAT: DID YOU FIND OUT?                                                        |      |          |              |     |
|--------------------------------------------------------------------------------|------|----------|--------------|-----|
| W: Who the medicine was for?                                                   |      |          |              |     |
| Self                                                                           | Y    | N        | Part         | N/A |
| H: How long they'd had the symptoms?                                           |      |          |              |     |
| Years – diagnosed with asthma as a child                                       | Y    | N        | Part         | N/A |
| A: About the actual symptoms?                                                  |      |          |              |     |
| Wheezy during day                                                              | Y    | N        | Part         | N/A |
| T: About treatment for this or any other condition?                            |      |          |              |     |
| What treatment they'd already tried? (Regular salbutamol use)                  | Y    | N        | Part         | N/A |
| Was the treatment successful? (Moderately)                                     | Y    | N        | Part         | N/A |
| If they take any other medication? (Have Seretide® – don't use it)             | Y    | N        | Part         | N/A |
| If they have any other medical conditions? (None)                              | Y    | N        | Part         | N/A |
| STOP: DID YOU STOP AND?                                                        |      |          |              |     |
| Consider the issue? (Poorly controlled asthma/no asthma management plan)       | Y    | N        | Part         | N/A |
| GO: DID YOU?                                                                   |      |          |              |     |
| Address the issue?                                                             |      |          |              |     |
| Refer to GP for review                                                         | Y    | N        | Part         | N/A |
| Suggest a review of asthma management plan                                     | Y    | N        | Part         | N/A |
| Other? (please record here)                                                    |      |          |              |     |
| Recommend/provide any <b>products</b> ?                                        | Y    | N        | Part         | N/A |
| Record Product Name/s and Strength:                                            |      |          |              |     |
| For each product you provided, did you:                                        |      |          |              |     |
| Recommend an appropriate dose and dosage interval?                             | Y    | N        | Part         | N/A |
| Recommend how long to use the product for?                                     | Y    | N        | Part         | N/A |
| Provide relevant <b>verbal advice</b> on asthma management?                    | Y    | N        | Part         | N/A |
| Record type of Verbal Advice                                                   |      |          |              |     |
| Provide relevant <b>written advice</b> ? (please attach to this form)          | Y    | N        | Part         | N/A |
| Provide appropriate <b>follow-on advice</b> ?                                  |      |          |              |     |
| Refer the customer to the doctor for the presenting symptoms?                  | Y    | N        | Part         | N/A |
| Tell the customer when to return to you?                                       | Y    | N        | Part         | N/A |
| Tell the customer when to visit the doctor (e.g. if it persists)?              | Y    | N        | Part         | N/A |
| Record any specific Follow-on advice (i.e. advice on WHAT to do next and WHEN) |      |          |              |     |
| OVERALL                                                                        |      |          |              |     |
| Do you think the visit had an <b>appropriate outcome</b> ?                     | Y    | N        | Part         | N/A |
| Do you think you established a <b>good rapport</b> with the customer?          | Y    | N        | Part         | N/A |
| How would you rate the information you provided?                               | Good | Adequate | Not Adequate |     |
| Do you have any comments?                                                      |      |          |              |     |
